# Supplementary material for: Genomic dissection of Klebsiella pneumoniae infections in hospital patients reveals insights into an opportunistic pathogen
Source: PubMed Central journal article supplement (PMC9156735; doi:10.1038/s41467-022-30717-6), 2022-05-31
Supplement: 41467_2022_30717_MOESM1_ESM.pdf [file 41467_2022_30717_MOESM1_ESM.pdf]

## **Supplementary Figures and Tables**

*accompanying the article*

**Genomic dissection of *Klebsiella pneumoniae*  
infections in hospital patients reveals insights into  
an opportunistic pathogen**

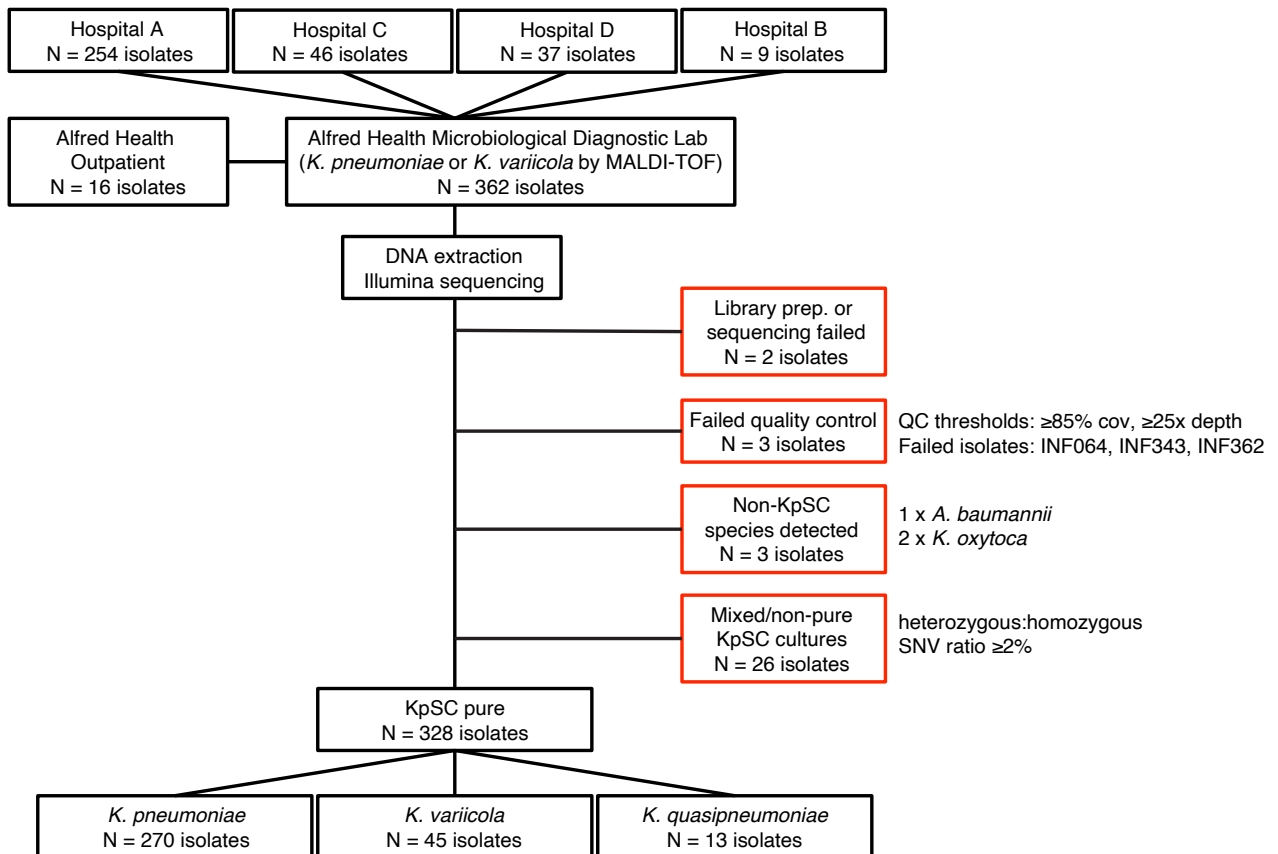

**Supplementary Figure 1: Flowchart for collection and sequencing of clinical isolates.**

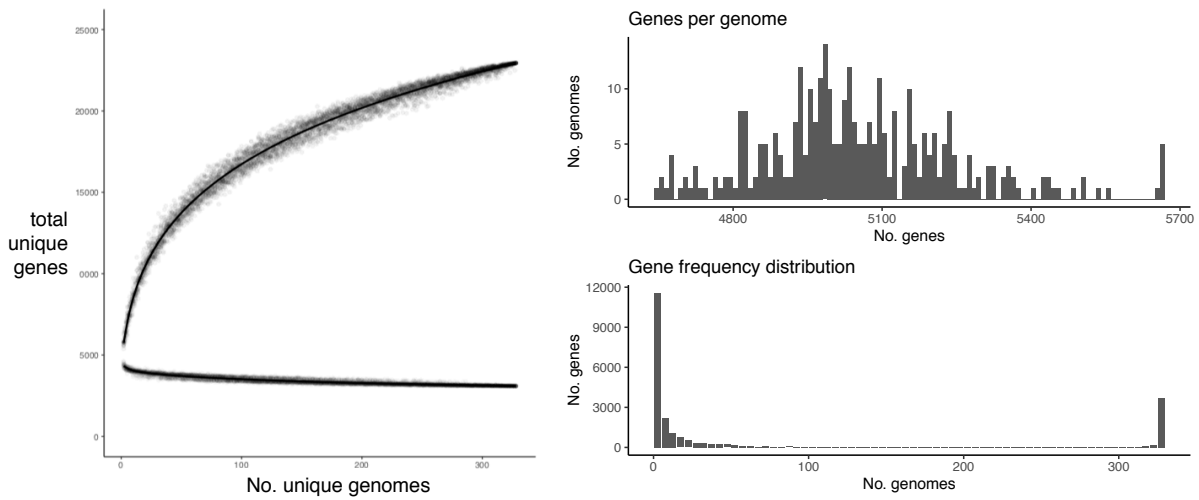

### Supplementary Figure 2: Pan genome.

Data used for this analysis was all KpSC genomes. (a) Upper curve shows the pan genome, i.e. total unique genes encountered (y-axis) in a sample of  $n$  genomes (x-axis). Lower curve shows the core genome, i.e. total genes shared by all genomes (y-axis), in a sample of  $n$  genomes (x-axis). Points correspond to 20 random samples of  $n$  genomes, for  $n=1, \dots, 328$ ; curves are Loess smoothed curves plotted through these points using the `geom_smooth()` function in R, with the formula `'y~log(x)'`. (b) Distribution of total number of genes per genome. (c) Distribution of gene frequencies across the set of 328 genomes.

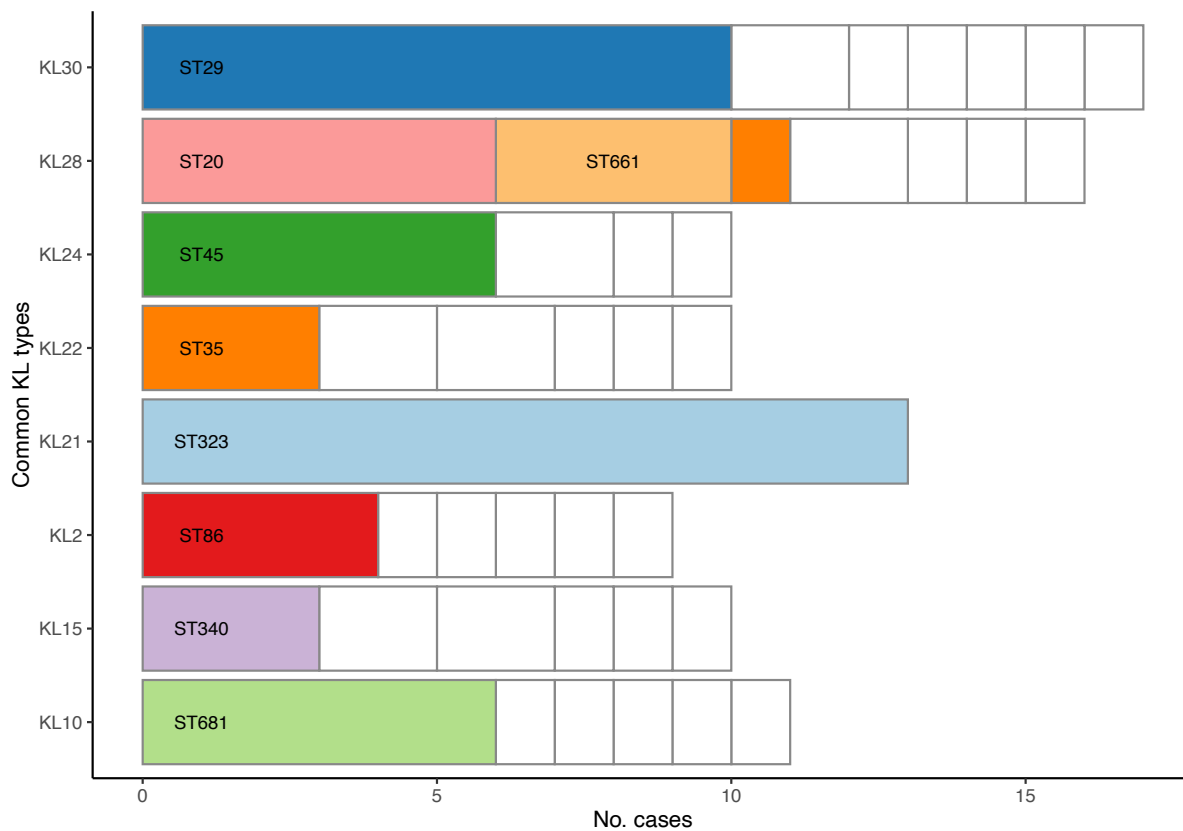

**Supplementary Figure 3: Eight most common K locus types.**

Data used for this analysis was the first isolate per unique infection episode, for 294 infection episodes. Stacked bars represent different K locus (KL) types and are stratified by ST; common STs are coloured and labelled; rare STs are coloured white.

**Supplementary Table 1: Capsule (K) biosynthesis loci identified in clinical isolates**

| <b>KL</b> | <b>No. infections</b> | <b>No. STs</b> | <b><i>man</i> operon</b> | <b><i>rml</i> operon</b> |
|-----------|-----------------------|----------------|--------------------------|--------------------------|
| KL30      | 17                    | 7              | yes                      | no                       |
| KL28      | 16                    | 7              | yes                      | no                       |
| KL21      | 13                    | 1              | yes                      | no                       |
| KL10      | 11                    | 6              | yes                      | no                       |
| KL15      | 10                    | 6              | no                       | no                       |
| KL22      | 10                    | 6              | no                       | no                       |
| KL24      | 10                    | 4              | yes                      | no                       |
| KL2       | 9                     | 6              | yes                      | no                       |
| KL14      | 8                     | 4              | yes                      | yes                      |
| KL25      | 8                     | 5              | no                       | no                       |
| KL63      | 8                     | 5              | yes*                     | no                       |
| KL39      | 6                     | 2              | yes                      | no                       |
| KL47      | 6                     | 6              | no                       | yes                      |
| KL54      | 6                     | 5              | yes*                     | no                       |
| KL55      | 6                     | 5              | no                       | yes                      |
| KL64      | 6                     | 4              | yes                      | yes                      |
| KL102     | 5                     | 3              | no                       | no                       |
| KL142     | 5                     | 5              | no                       | yes                      |
| KL16      | 5                     | 4              | yes*                     | no                       |
| KL118     | 4                     | 1              | no                       | yes                      |
| KL38      | 4                     | 4              | no                       | no                       |
| KL53      | 4                     | 3              | yes                      | yes                      |
| KL57      | 4                     | 3              | yes                      | no                       |
| KL116     | 3                     | 1              | yes                      | no                       |
| KL13      | 3                     | 3              | yes                      | no                       |
| KL20      | 3                     | 3              | yes                      | no                       |
| KL3       | 3                     | 3              | yes                      | no                       |
| KL52      | 3                     | 2              | no                       | yes                      |
| KL60      | 3                     | 3              | yes                      | no                       |
| KL7       | 3                     | 2              | yes                      | no                       |
| KL9       | 3                     | 3              | no                       | yes                      |
| KL103     | 2                     | 2              | no                       | yes                      |
| KL105     | 2                     | 2              | no                       | yes                      |
| KL109     | 2                     | 1              | yes                      | yes                      |
| KL114     | 2                     | 2              | yes                      | no                       |
| KL122     | 2                     | 2              | yes                      | no                       |
| KL124     | 2                     | 1              | no                       | yes                      |
| KL125     | 2                     | 2              | no                       | no                       |
| KL143     | 2                     | 2              | yes                      | no                       |
| KL169     | 2                     | 2              | yes                      | yes                      |
| KL170     | 2                     | 1              | no                       | yes                      |
| KL36      | 2                     | 2              | no                       | yes                      |
| KL46      | 2                     | 2              | yes                      | no                       |
| KL48      | 2                     | 2              | no                       | yes                      |
| KL51      | 2                     | 2              | no                       | no                       |
| KL58      | 2                     | 2              | yes*                     | no                       |
| KL62      | 2                     | 2              | yes                      | no                       |
| KL71      | 2                     | 2              | no                       | yes                      |
| KL8       | 2                     | 2              | no                       | no                       |
| KL1       | 1                     | 1              | yes*                     | no                       |
| KL101     | 1                     | 1              | no                       | yes                      |
| KL107     | 1                     | 1              | no                       | yes                      |
| KL108     | 1                     | 1              | yes                      | no                       |
| KL11      | 1                     | 1              | no                       | no                       |
| KL111     | 1                     | 1              | no                       | no                       |

| KL      | No. infections | No. STs | <i>man</i> operon | <i>rml</i> operon |
|---------|----------------|---------|-------------------|-------------------|
| KL112   | 1              | 1       | yes               | no                |
| KL113   | 1              | 1       | yes               | no                |
| KL119   | 1              | 1       | yes               | no                |
| KL12    | 1              | 1       | no                | yes               |
| KL120   | 1              | 1       | no                | yes               |
| KL123   | 1              | 1       | no                | no                |
| KL127   | 1              | 1       | no                | yes               |
| KL130   | 1              | 1       | yes               | yes               |
| KL131   | 1              | 1       | no                | yes               |
| KL132   | 1              | 1       | yes               | no                |
| KL133   | 1              | 1       | yes               | no                |
| KL134   | 1              | 1       | no                | no                |
| KL137   | 1              | 1       | yes               | yes               |
| KL139   | 1              | 1       | yes               | no                |
| KL140   | 1              | 1       | yes               | no                |
| KL141   | 1              | 1       | yes               | yes               |
| KL144   | 1              | 1       | yes               | yes               |
| KL146   | 1              | 1       | yes               | no                |
| KL153   | 1              | 1       | yes               | no                |
| KL158   | 1              | 1       | no                | yes               |
| KL166   | 1              | 1       | yes               | yes               |
| KL167   | 1              | 1       | yes               | no                |
| KL168   | 1              | 1       | yes               | yes               |
| KL17    | 1              | 1       | no                | yes               |
| KL18    | 1              | 1       | no                | yes               |
| KL19    | 1              | 1       | no                | yes               |
| KL23    | 1              | 1       | no                | yes               |
| KL34    | 1              | 1       | no                | yes               |
| KL35    | 1              | 1       | yes               | no                |
| KL37    | 1              | 1       | no                | no                |
| KL4     | 1              | 1       | no <sup>^</sup>   | no                |
| KL42    | 1              | 1       | yes               | no                |
| KL45    | 1              | 1       | no                | yes               |
| KL5     | 1              | 1       | yes               | no                |
| KL61    | 1              | 1       | yes               | no                |
| KL67    | 1              | 1       | yes               | yes               |
| unknown | 11             | 11      | -                 | -                 |

**Supplementary Table 1: Capsule (K) biosynthesis loci identified in clinical isolates.**

'No. STs' indicates the number of unique multi-locus sequence types (STs) each K locus was identified in. Presence of the mannose (*man*) or rhamnose (*rml*) operons are indicated. For KL with known structures (KL1-KL82): presence of *rml* is perfectly correlated with presence of rhamnose in the expressed capsular polysaccharide (CPS); \* indicates KL is *man*<sup>+</sup> but CPS lacks mannose; ^ indicates KL is *man*<sup>-</sup> but CPS contains mannose. Sugar structures for CPS encoded by KL100-KL170 are unknown.

| Species    | ST     | No. Patients | AMR           | <i>ybt</i>    | K locus             | O type |
|------------|--------|--------------|---------------|---------------|---------------------|--------|
| <i>Kp</i>  | ST29   | 9            | ESBL, MDR     | -             | KL30 <sup>m</sup>   | O1     |
| <i>Kv</i>  | ST681  | 6            | susceptible*  | -             | KL10 <sup>m</sup>   | O2afg  |
| <i>Kp</i>  | ST323  | 4            | ESBL, MDR     | -             | KL21 <sup>m</sup>   | O3b    |
| <i>Kp</i>  | ST323  | 3            | ESBL, MDR     | -             | KL21 <sup>m</sup>   | O3b    |
| <i>Kp</i>  | ST231  | 3            | CP, ESBL, MDR | <i>ybt</i> 15 | KL64 <sup>m,r</sup> | O1     |
| <i>Kp</i>  | ST491  | 3            | ESBL, MDR     | -             | KL118 <sup>r</sup>  | OL101  |
| <i>Kp</i>  | ST340  | 3            | ESBL, MDR     | <i>ybt</i> 16 | KL15                | O4     |
| <i>Kp</i>  | ST2370 | 2            | ESBL, MDR     | <i>ybt</i> 4  | KL15                | O4     |
| <i>Kqs</i> | ST5872 | 2            | ESBL, MDR     | -             | KL7 <sup>m</sup>    | O12    |
| <i>Kp</i>  | ST45   | 2            | susceptible   | <i>ybt</i> 10 | KL24 <sup>m</sup>   | O2a    |
| <i>Kqs</i> | ST1548 | 2            | susceptible   | -             | KL170               | O3/O3a |
| <i>Kqs</i> | ST480  | 2            | susceptible   | -             | KL52 <sup>r</sup>   | OL103  |

**Supplementary Table 2: Features of probable nosocomial transmission clusters.**

*Kp*, *K. pneumoniae*; *Kv*, *K. variicola*; *Kqs*, *K. quasipneumoniae* subsp. *similipneumoniae*. ST, sequence type. Patients, number of patients involved in the putative cluster. AMR, indicates presence of antimicrobial resistance including CP (carbapenemase producing), ESBL (extended spectrum beta-lactamase producing), MDR (multidrug resistant, i.e. resistant to  $\geq 3$  drug classes in addition to ampicillin). \*The last ST681 isolated was ESBL and MDR. *Ybt* column indicates presence of yersiniabactin lineages; K locus column indicates the capsule biosynthesis locus present; O type column indicates the O (lipopolysaccharide) antigen predicted from genome data.

| <i>Predictors</i>   | <b>Transmission</b> |                    |                               |
|---------------------|---------------------|--------------------|-------------------------------|
|                     | <i>Odds Ratio</i>   | <i>95% CI</i>      | <i>p</i>                      |
| ESBL+               | <b>21.0</b>         | <b>9.21 – 51.1</b> | <b>&lt;1x10<sup>-11</sup></b> |
| Yersiniabactin      | 1.00                | 0.38 – 2.49        | 0.997                         |
| Patient Age (years) | <b>0.97</b>         | <b>0.95 – 1.00</b> | <b>0.017</b>                  |
| Patient Sex (male)  | 0.89                | 0.37 – 2.07        | 0.779                         |
| Onset day ≥3        | <b>2.64</b>         | <b>1.12 – 6.42</b> | <b>0.028</b>                  |
| <i>man+</i> KL      | 0.52                | 0.17 – 1.46        | 0.230                         |
| <i>man+</i> OL      | 1.22                | 0.49 – 3.17        | 0.673                         |

**Supplementary Table 3: Logistic regression model for transmission.**

Results shown are for a multivariable logistic regression model of 294 unique infections, with all variables included as predictors (95% CI = 95% confidence intervals for odds ratios). All variables were coded as binary except for age, which is continuous and expressed in years. Unadjusted p-values are shown, those with  $p < 0.05$  are bolded.



| <b>(a) Community Acquired</b> |                   |               |          |  |  |  |
|-------------------------------|-------------------|---------------|----------|--|--|--|
| <i>Predictors</i>             | <i>Odds Ratio</i> | <i>95% CI</i> | <i>p</i> |  |  |  |
| Species <i>K. pneumoniae</i>  | 0.83              | 0.31 – 2.40   | 0.712    |  |  |  |
| ESBL+                         | 0.55              | 0.15 – 1.50   | 0.287    |  |  |  |
| Ybt+                          | 2.03              | 0.89 – 4.57   | 0.088    |  |  |  |
| luc+                          | 0.58              | 0.03 – 3.78   | 0.626    |  |  |  |
| Patient Age (years)           | 1.00              | 0.98 – 1.02   | 0.930    |  |  |  |
| Patient Sex (male)            | 0.72              | 0.34 – 1.47   | 0.371    |  |  |  |
| <i>rml+</i> KL                | 0.67              | 0.26 – 1.58   | 0.378    |  |  |  |
| <i>man+</i> KL                | 1.27              | 0.60 – 2.78   | 0.545    |  |  |  |
| <i>man+</i> OL                | 1.53              | 0.69 – 3.32   | 0.284    |  |  |  |

  

| <i>Predictors</i>            | <b>(b) Onset day 3+</b> |                    |                  | <b>(c) Onset day 3+ and/or recent inpatient admission</b> |                    |              |
|------------------------------|-------------------------|--------------------|------------------|-----------------------------------------------------------|--------------------|--------------|
|                              | <i>Odds Ratio</i>       | <i>95% CI</i>      | <i>p</i>         | <i>Odds Ratio</i>                                         | <i>95% CI</i>      | <i>p</i>     |
| Species <i>K. pneumoniae</i> | 1.39                    | 0.69 – 2.86        | 0.365            | 1.04                                                      | 0.52 – 2.06        | 0.917        |
| ESBL+                        | <b>2.34</b>             | <b>1.18 – 4.72</b> | <b>0.015</b>     | <b>2.03</b>                                               | <b>1.04 – 4.10</b> | <b>0.042</b> |
| Ybt+                         | 0.79                    | 0.42 – 1.47        | 0.465            | 0.77                                                      | 0.42 – 1.38        | 0.379        |
| luc+                         | 0.31                    | 0.02 – 2.00        | 0.299            | 0.43                                                      | 0.06 – 2.10        | 0.336        |
| Patient Age (years)          | 1.01                    | 0.99 – 1.02        | 0.406            | 1.00                                                      | 0.99 – 1.01        | 0.780        |
| Patient Sex (male)           | <b>2.20</b>             | <b>1.32 – 3.71</b> | <b>0.003</b>     | <b>1.72</b>                                               | <b>1.05 – 2.82</b> | <b>0.031</b> |
| <i>rml+</i> KL               | <b>3.12</b>             | <b>1.72 – 5.74</b> | <b>&lt;0.001</b> | <b>2.05</b>                                               | <b>1.14 – 3.75</b> | <b>0.017</b> |
| <i>man+</i> KL               | 0.78                    | 0.45 – 1.35        | 0.369            | 0.77                                                      | 0.46 – 1.30        | 0.332        |
| <i>man+</i> OL               | 0.87                    | 0.49 – 1.52        | 0.620            | 0.67                                                      | 0.39 – 1.15        | 0.146        |

**Supplementary Table 4: Logistic regression models for infection acquisition.**

Results shown are for a multivariable logistic regression model of 294 unique infections, with all variables included as predictors (95% CI = 95% confidence intervals for odds ratios). Unadjusted p-values are shown. Predictors with P-values below 0.05 are bolded. All variables were coded as binary except for age, which is continuous and expressed in years. (a) Outcome variable = community associated (CA) infection, i.e. isolation from an outpatient or on day 0–2 of current admission as an inpatient, and with no recorded prior contact with the Alfred Health Network (either as an inpatient or outpatient) in the previous 12 months (n=38 CA vs 256 non-CA). (b) Outcome variable = nosocomial onset, defined as isolation on day 3 or later of the current inpatient admission (n=122 vs 172). (c) Outcome variable = nosocomial, defined as isolation on day 3 or later of the current inpatient admission or with recent inpatient admission (in the last month) (n=151 vs 143).
